# Supplementary material
Source: publisher figshare collection journal article supplement (https://tandf.figshare.com/ndownloader/files/18004454)
Supplement: Supplementary file 1 [file 18004454]

**Supplementary Information (SI)**

1. **SI Materials and methods**

***S1.1 Protein preparation for ZDOCK.***

The crystal structures of BIRC5 (PDB ID: 3UIH), ATG5 (PDB ID: 4TQ1), ATG12 (PDB ID: 4NAW), ATG12–ATG5 (PDB ID: 4NAW) were downloaded from PDB (Protein Data bank), and were pre-processed using discovery studio visualizer (Discovery Studio 3.1, Accelrys, Co. Ltd) by removing crystal water and other hetero atoms except Zn2+ metal ion in the case of BIRC5 protein. Then, the protein preparation was carried out by adding hydrogens, filling missing loops, side chains, and disulfide bridges. Further, ionization and protonation states of the protein were derived at neutral pH. Finally, the protein minimization was carried out to remove steric clashes by employing CHARMm force field.

***S1.2 Protein-protein docking using ZDOCK and RDOCK.***

The prepared autophagy proteins ATG5, ATG12 and ATG12–ATG5 were individually subjected to protein-protein docking with BIRC5 using ZDOCK module of discovery studio [1]. While performing docking, angular step size was set to 6º, and the remaining parameters were retained at default values. After docking, about 2000 docking poses were generated and they were subsequently categorized into 100 clusters based on their binding orientation, RMSD (10 Å), and interface cut-off value (10 Å). All the docked poses were scored and ranked according to their ZDOCK scores. From this, the top ranked 100 poses from 10 largest clusters were selected for refinement. Refinement of the docked poses was carried out using RDOCK with default parameters [2]. In order to pick the near-native structures from RDOCK, statistical analysis was carried out by plotting a graph between clusters *vs.* E-RDOCK Scores. Finally, three top scoring poses each from three different clusters were chosen for MD (Molecular Dynamics) simulation study to check the stability of the predicted pose of the protein-protein complex.

***S1.3 MD simulation of protein-protein complex.***

The selected top poses of the protein-protein complex were subjected to MD simulation using GROMACS v5.0.5 by employing AMBER99SB-ILDN force field. The individual protein-protein complex structures of ATG5-BIRC5, ATG12-BIRC5, and ATG12–ATG5-BIRC5 (each protein-protein complex is considered as a “system”) were retained in a cubic box of size 1.0 Å and were solvated with SPC-216 water model. Then, each individual system was neutralized by the addition of Na+/Cl- ions, and performed protein geometry optimization to converge the system up to 10 kJ mol−1 nm−1 using steepest descent and conjugate gradient algorithms. Further, to settle the solvent and ions around the solute (protein), the systems were equilibrated at constant ensemble of NVT (Number of particles, Volume, and Temperature) and NPT (Number of particles, Pressure, and Temperature) over a period of 500 ps. Finally, each individual system was subjected to a production run at constant temperature (300 K) and pressure (1 bar).

During MD simulation, time step (dt) was set to 2 fs, and periodic boundary condition was applied. The LINKS algorithm was used to constrain all the bonds, and PME (Particle Mesh Ewald) approach was used to monitor long-range electrostatic interactions. The V-rescale and Parrinello-Rahman coupling methods were used to maintain the standard temperature (300 k) and pressure (1 bar) throughout the simulation, respectively.

1. **SI Results**

***S2.1 Detailed descriptions on the results of the computational modelling analysis.***

“Protein preparation” is an important procedure, typically carried out before performing molecular docking of biomolecules, as it completes the structure by filling missing atoms and residues. Further, it optimizes the protein geometries by employing a certain force field parameters, and removes the steric clashes if exists among the atoms. Thus, to perform the molecular docking of proteins, the available crystal structures of BIRC5, ATG5, ATG12, and ATG12–ATG5 were downloaded from protein data bank and were prepared using discovery studio software suit as described in materials and methods. Moreover, the prepared structures were optimized to correct their geometries by employing CHARMm force field.

Then, protein-protein docking of BIRC5 with ATG5, ATG12 and ATG12–ATG5 was carried out using ZDOCK, followed by refinement using RDOCK. ZDOCK, is a rigid-body docking protocol, which uses an individual protein crystal structures (or) modeled structures as inputs, and predicts probable binding mode of the complex structures based on PSC (Pairwise Shape Complementarity) method. Refinement of the docked poses using RDOCK significantly improves the docking quality by removing steric clashes and also helps in picking the near native structure by geometry optimization and rescoring process. Three plausible poses (*i.e.* poses with top scores after statistical analysis) from three different clusters were chosen for each individual protein complex structure. Thus, in the case of ATG5-BIRC5 docking: pose 420, pose 305 and pose 633 were chosen from cluster 3, 7 and 5, respectively (**Fig. S4, top panel**). In the case of ATG12-BIRC5 docking: pose 7, pose 144 and pose 95 were chosen from cluster 2, 6 and 1, respectively (**Fig. S4, middle panel**). In the case of ATG12–ATG5-BIRC5 docking: pose 224, pose 251 and pose 44 were chosen from cluster 7, 6 and 1, respectively (**Fig. S4, bottom panel**). It should be noted that the poses within a particular cluster are having similar binding orientation, so only the top scored pose was chosen to represent the whole cluster poses. The selected poses of ATG5-BIRC5, ATG12-BIRC5, and ATG12–ATG5-BIRC5 were subjected to MD simulation analysis to check for their stability.

To access the stability of the selected poses, MD simulation over a period of 30 ns was carried out. The protein-protein complex stability was evaluated by measuring the root-mean-square deviation (RMSD) of the protein backbone, radius of gyration (protein compactness), SASA (solvent-accessible surface area), and total energy profiles of the complexes. From these consensus results, the pose from cluster 7 (top scored pose 305) in the case of ATG5-BIRC5 (**Fig. S5**), the pose from cluster 2 (top scored pose 7) in the case of ATG12-BIRC5 (**Fig. S6**), and the pose from cluster 1 (top scored pose 44) in the case of ATG12–ATG5-BIRC5 docking (**Fig. S7**) were stable throughout the simulation and were used for further analysis.

Examination of the ATG5-BIRC5 complex (**Fig. 4B**) revealed that the BIRC5’s baculovirus inhibitor-of-apoptosis protein repeat (BIR) domain helix-turn-helix (residues: 72-89) and β3 sheet (residues: 59-65) and few of the N-terminal α6 helix residues are involved in making interactions with ATG5. All the non-bonded interactions (hydrogen bonds, Pi interactions and salt bridges) of ATG5-BIRC5 are listed in **Table S1**. Analysis of the conserved residues that exist in the interface region of the ATG5-BIRC5 protein complex and ATG12–ATG5 crystal complex showed that nine residues (Lys78, His80, Lue113, Ser127, Lys130, Glu131, Ala134, Arg188 and Gln200) of ATG5 are common in the both the structures (**Fig. 4B**) [3]. Moreover, the residues His80 and Glu131 of ATG5 are making non-bonded interaction in ATG5-BIRC5 complex as in the case of ATG12–ATG5 complex. Additionally, superposition of the modeled structure of ATG5-BIRC5 with the crystal structure of ATG12–ATG5 revealed that the BIRC5 BIR domain helix-turn-helix (residues: 72-89) region is overlapping with the binding site of ATG12 in ATG12–ATG5 complex, and could competitively interfere with the ATG12–ATG5 complex formation (**Fig. 4B**).

Analysis of ATG12-BIRC5 complex revealed that the binding site region of ATG12 for BIRC5 as well as that for ATG5 is quite similar (**Fig. 4B**). Superposition of ATG12-BIRC5 with ATG12–ATG5 structure revealed that few conserved residues Phe101, Asn105, Gln106, Phe108, Ala109, Cys122, Phe123, Ala138, Trp139 and Gly140 of ATG12, which are present in the interface region of ATG12-BIRC5 complex, are also present in the interface region of ATG12–ATG5 complex structure (**Table S2; Fig. 4B**). This result suggests that BIRC5 can bind to ATG5 and ATG12 independently using two different binding sites that are located at the BIR domain. To confirm this, the modeled structures of ATG5-BIRC5 and ATG12-BIRC5 were superimposed and we found that there is no clash between ATG5 and ATG12 when BIRC5 bound to these proteins (**Fig. 4B**). Taken together, results of the modeling experiments suggest that BIRC5 may interfere with the formation of ATG12–ATG5 complex by binding with ATG5 and ATG12 at the interface region through its BIR domain.

The binding mode analysis of BIRC5 with ATG12–ATG5 conjugate also revealed that BIRC5 could physically interact with ATG12–ATG5 conjugate (**Fig. 4B**), and thereby inhibit ATG12–ATG5-ATG16L1 complex formation. Comprehensive analysis of docking results suggests that BIRC5 binds to ATG5 protein using the N-terminal α6 helix. Superposition of the docked complex structure of ATG12–ATG5-BIRC5 with reported crystal structure of ATG12–ATG5-ATG16L1 clearly showed that the BIRC5 N-terminal α6 helix region overlapped with the N-terminal ATG16L1 helical region (**Fig. 4B**). Further, analysis of non-bonded interactions that are involved in ATG12–ATG5-BIRC5 complex revealed that the residues Asp3, Asp4, Asp10, Glu244, Pro245 and Trp253, which are making non-bonded interactions, are also present in ATG12–ATG5-ATG16L1 complex structure (**Table S3**). Thus, from the predicted binding mode and the interactions, we infer that BIRC5 may interfere with ATG12–ATG5-ATG16L1 complex formation.

1. **SI Reference**

1. Chen, R. and Z. Weng, *Docking unbound proteins using shape complementarity, desolvation, and electrostatics.* Proteins, 2002. **47**(3): p. 281-294.

2. Li, L., R. Chen, and Z. Weng, *RDOCK: refinement of rigid-body protein docking predictions.* Proteins, 2003. **53**(3): p. 693-707.

3. Otomo, C., et al., *Structure of the human ATG12~ATG5 conjugate required for LC3 lipidation in autophagy.* Nat Struct Mol Biol, 2013. **20**(1): p. 59-66.

**Table S1.** Non-bonded interactions of ATG5-BIRC5 PPI complex.

| **BIRC5** | **ATG5** | **Interaction constituents** | **Distance (Å)** |
| --- | --- | --- | --- |
| **Hydrogen bond interactions** | | | |
| A:LYS62 | B:GLU109 | A:LYS62:HZ1 - B:GLU109:O | 2.25 |
| A:LYS62 | B:LYS110 | A:LYS62:HZ2 - B:LYS110:O | 2.34 |
| A:LYS79 | B:LYS78 | B:LYS78:HZ3 - A:LYS79:O | 2.23 |
| A:GLU125 | B:SER106 | B:SER106:H - A:GLU125:OE2 | 2.37 |
| A:GLU125 | B:SER106 | B:SER106:HG - A:GLU125:OE1 | 2.23 |
| A:LYS62 | B:ASP111 | A:LYS62:HE2 - B:ASP111:O | 2.87 |
| A:LYS62 | B:LEU112 | A:LYS62:HE2 - B:LEU112:O | 2.50 |
| A:HIS80 | B:LYS110 | A:HIS80:HE1 - B:LYS110:O | 2.68 |
| A:HIS80 | B:ASP111 | A:HIS80:HE1 - B:ASP111:OD1 | 2.55 |
| A:LYS115 | B:GLU109 | A:LYS115:HE1 - B:GLU109:OE1 | 2.00 |
| A:LYS121 | B:GLU67 | A:LYS121:HE1 - B:GLU67:OE2 | 2.92 |
| A:LYS121 | B:GLU67 | A:LYS121:HE2 - B:GLU67:OE2 | 2.80 |
| A:HIS80 | B:HIS80 | B:HIS80:HE1 - A:HIS80:O | 2.98 |
| A:GLU125 | B:LYS105 | B:LYS105:HA - A:GLU125:OE2 | 2.37 |
| A:GLU125 | B:SER106 | B:SER106:HA - A:GLU125:OE1 | 2.80 |
| **Pi-Cation interactions** | | | |
| A:LYS78 | B:PHE198 | A:LYS78:NZ - B:PHE198 | 4.37 |
| A:LYS121 | B:HIS114 | A:LYS121:NZ - B:HIS114 | 3.34 |
| A:HIS80 | B:LYS78 | B:LYS78:NZ - A:HIS80 | 4.13 |
| **Salt bridge interactions** | | | |
| A:LYS90 | B:GLU131 | A:LYS90:HZ2 - B:GLU131:OE1 | 1.68 |
| A:LYS115 | B:GLU109 | A:LYS115:HZ3 - B:GLU109:OE1 | 2.42 |
| A:LYS121 | B:GLU67 | A:LYS121:HZ3 - B:GLU67:OE1 | 1.73 |

**Table S2.** Non-bonded interactions of ATG12-BIRC5 PPI complex.

| **BIRC5** | **ATG12** | **Interaction constituents** | **Distance (Å)** |
| --- | --- | --- | --- |
| **Hydrogen bond interactions** | | | |
| B:GLU49 | A:ALA61 | A:ALA61:H - B:GLU49:OE2 | 2.14 |
| B:PRO8 | A:GLN137 | A:GLN137:HE22 - B:PRO8:O | 2.37 |
| B:HIS17 | A:GLN137 | B:HIS17:HE2 - A:GLN137:O | 2.41 |
| B:GLN56 | A:GLN106 | B:GLN56:HE22 - A:GLN106:O | 2.34 |
| B:LYS112 | A:SER107 | B:LYS112:HZ2 - A:SER107:O | 2.46 |
| B:LYS120 | A:CYS122 | B:LYS120:HZ1 - A:CYS122:O | 2.09 |
| B:PRO8 | A:GLN137 | B:PRO8:HA - A:GLN137:OE1 | 2.45 |
| B:HIS17 | A:GLN137 | B:HIS17:HE1 - A:GLN137:O | 2.72 |
| B:LYS112 | A:GLY140 | B:LYS112:HE1 - A:GLY140:O | 2.75 |
| B:LYS112 | A:SER107 | B:LYS112:HE2 - A:SER107:OG | 2.32 |
| B:LYS112 | A:SER107 | B:LYS112:HE2 - A:SER107:O | 2.52 |
| **Pi-Alkylinteractions** | | | |
| B:CYS46 | A:TRP139 | A:TRP139 - B:CYS46 | 4.64 |
| **Salt bridge interactions** | | | |
| B:LYS130 | A:ASP126 | B:LYS130:HZ3 - A:ASP126:OD1 | 1.90 |

**Table S3.** Non-bonded interactions of ATG12–ATG5-BIRC5 PPI complex

| **BIRC5** | **ATG12**–**ATG5** | | **Interaction Constituents** | **Distance (Å)** |
| --- | --- | --- | --- | --- |
| **Hydrogen bond interactions** | | | | |
| C:SER82 | B:ASP4 | | C:SER82:HG - B:ASP4:OD1 | 2.42 |
| C:LYS120 | B:GLU244 | | C:LYS120:HE1 - B:GLU244:O | 2.23 |
| C:LYS120 | B:PRO245 | | C:LYS120:HE2 - B:PRO245:O | 2.60 |
| **Pi-interactions** | | | | |
| C:PHE124 | B:GLU244 | | B:GLU244:H - C:PHE124 | 3.26 |
| C:LYS110 | B:TRP253 | | B:TRP253 - C:LYS110 | 4.42 |
| C:ALA114 | B:TRP253 | | B:TRP253 - C:ALA114 | 4.47 |
| **Salt bridge interactions** | | | | |
| C:LYS62 | B:ASP3 | C:LYS62:HZ3 - B:ASP3:OD1 | | 1.65 |
| C:LYS120 | B:GLU244 | C:LYS120:HZ3 -B:GLU244:OE2 | | 2.00 |
| C:LYS121 | B:ASP10 | C:LYS121:HZ2 - B:ASP10:OD2 | | 1.72 |

**SI Figures**


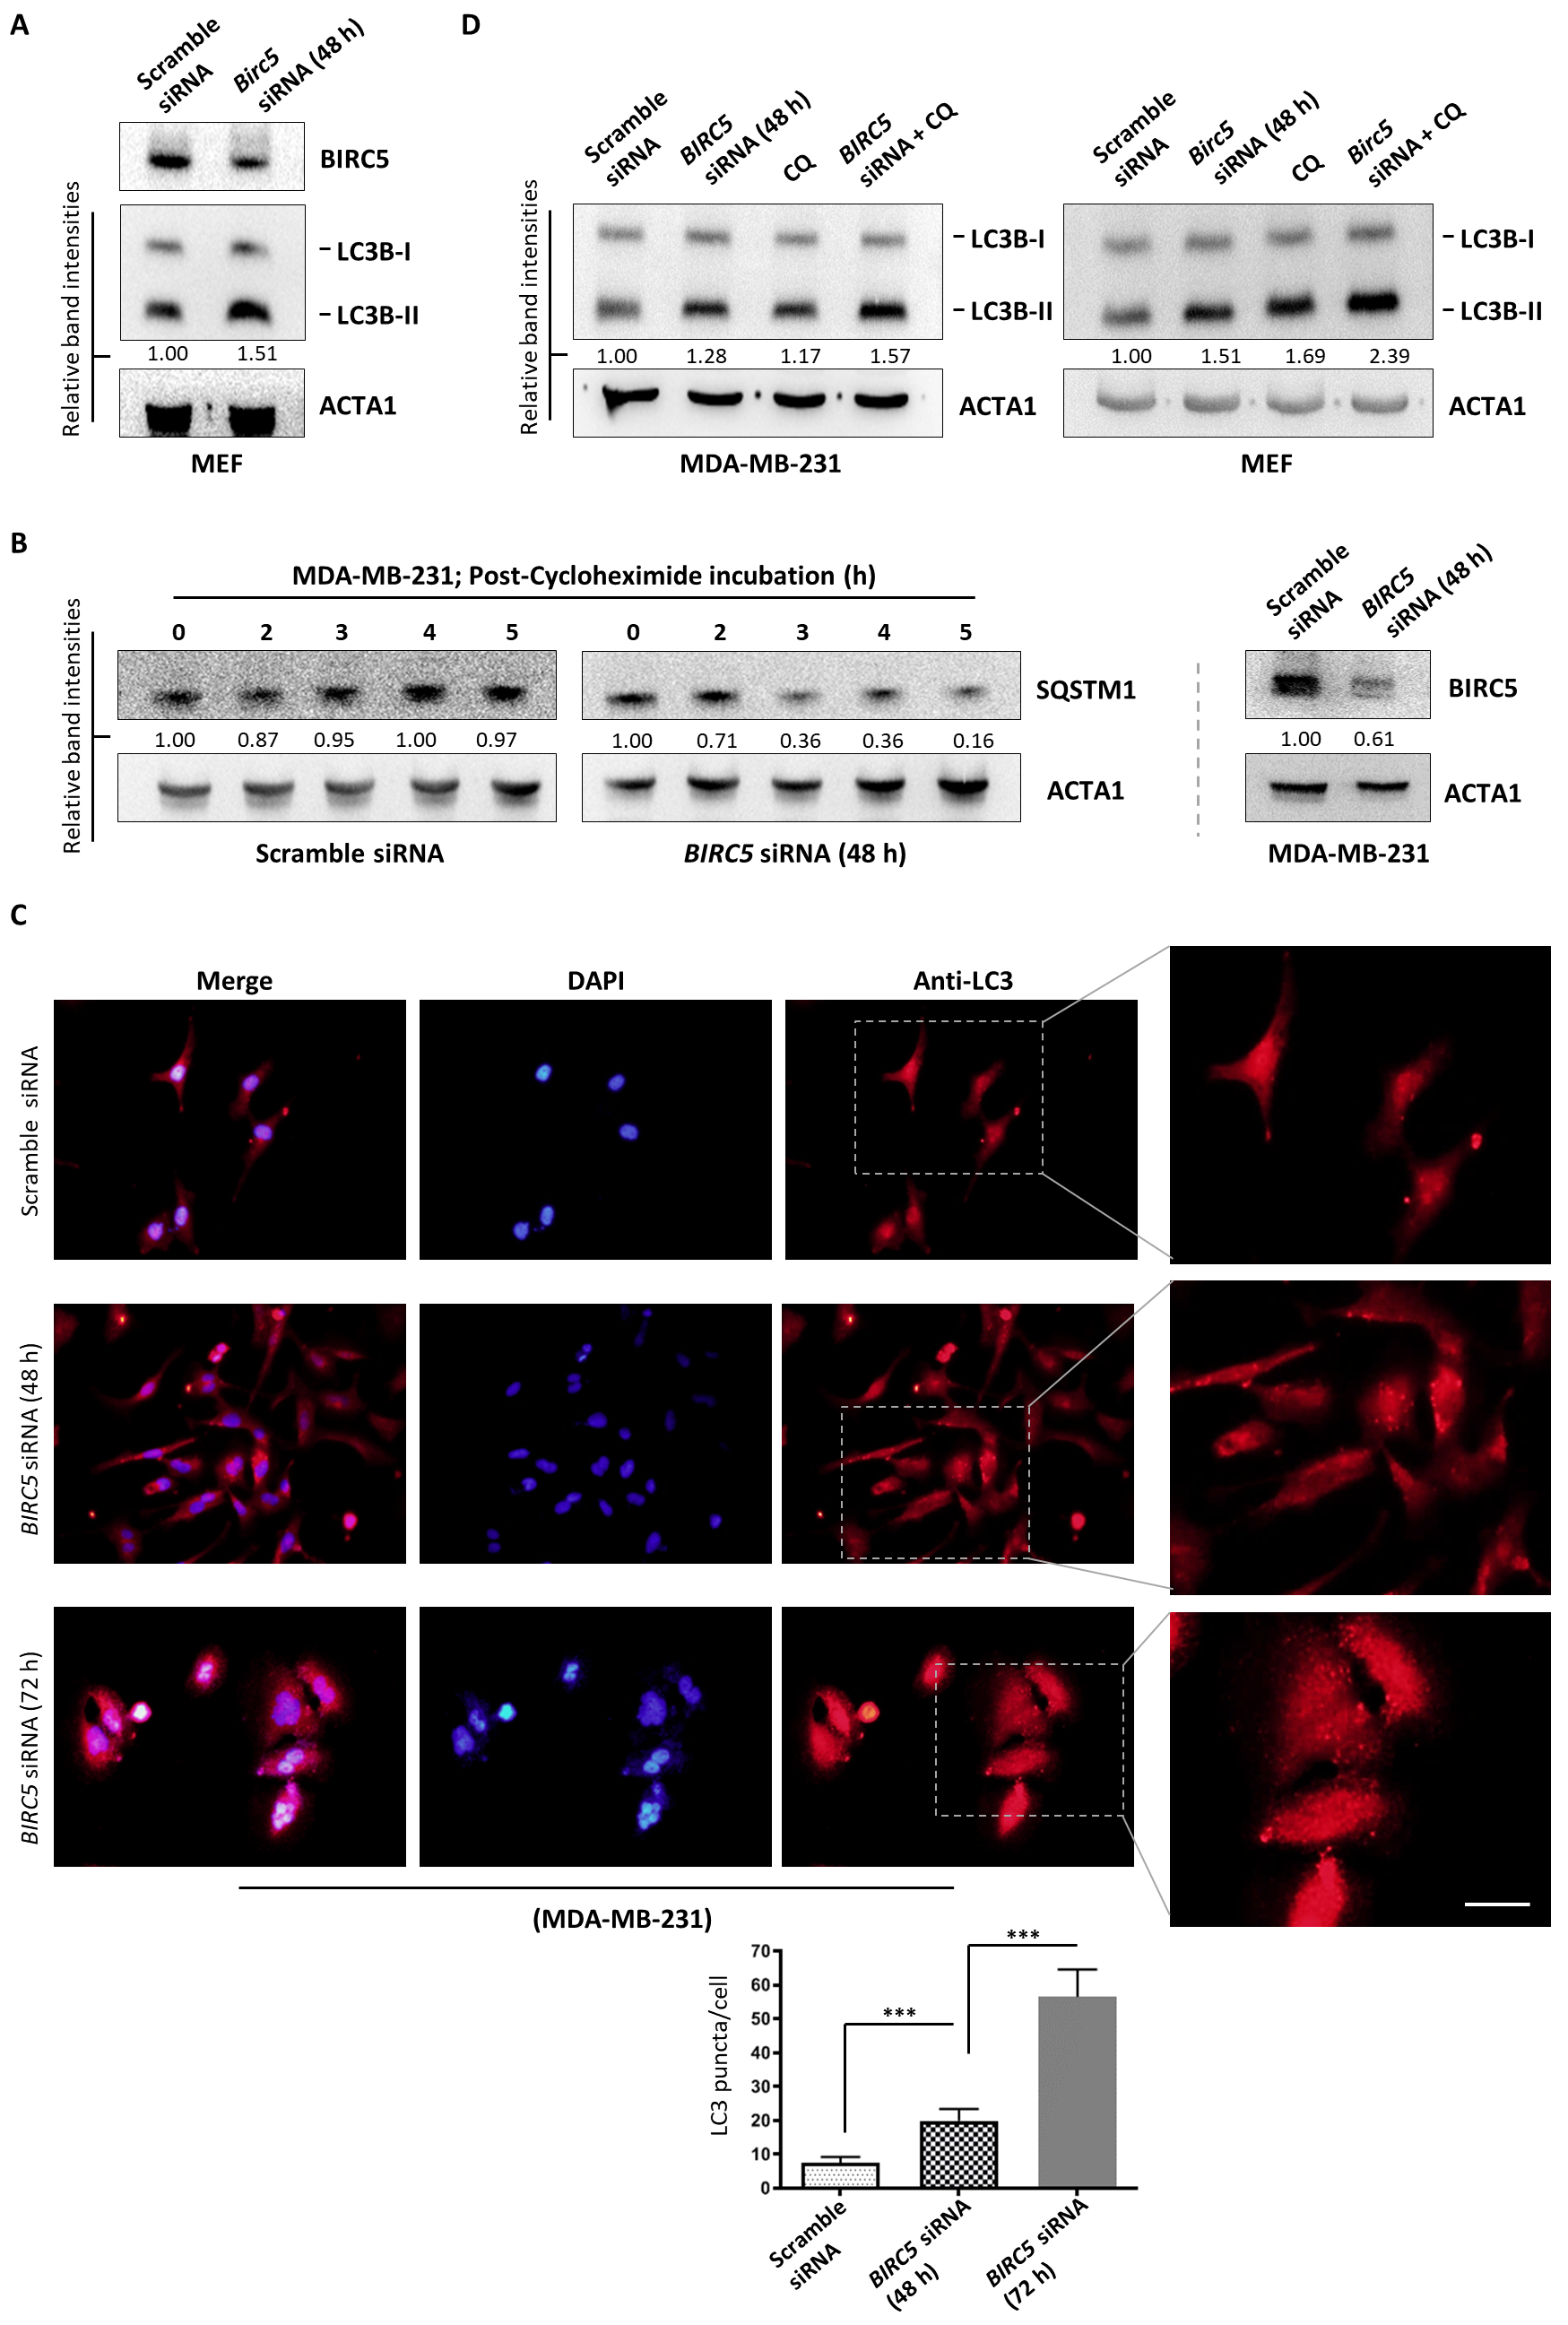


**Figure S1.** Downregulation of BIRC5 induces autophagy in mammalian cells.(**A**) MEF cells were treated with either scramble siRNA or *Birc5* siRNA for 48 h. Conversion of LC3B-II was determined by western blotting. ACTA1/Actin was used as an internal control. (**B**) MDA-MB-231 cells were treated with either scramble siRNA or *BIRC5* siRNA for 48 h. The protein stability of SQSTM1 was determined by the cycloheximide chase assay (left) and the expression of BIRC5 was determined by western blotting (right). (**C**) Cells were treated with either scramble siRNA or *BIRC5* siRNA for the indicated durations. Expression and of LC3 was determined by immunofluorescent microscopy. Nuclei were countered stained by DAPI. Scale bar: 30 μm. (**D**) Cells were treated with either scramble siRNA or *BIRC5* siRNA together with or without CQ (chloroquine). Conversion of LC3B-II was determined by western blotting.


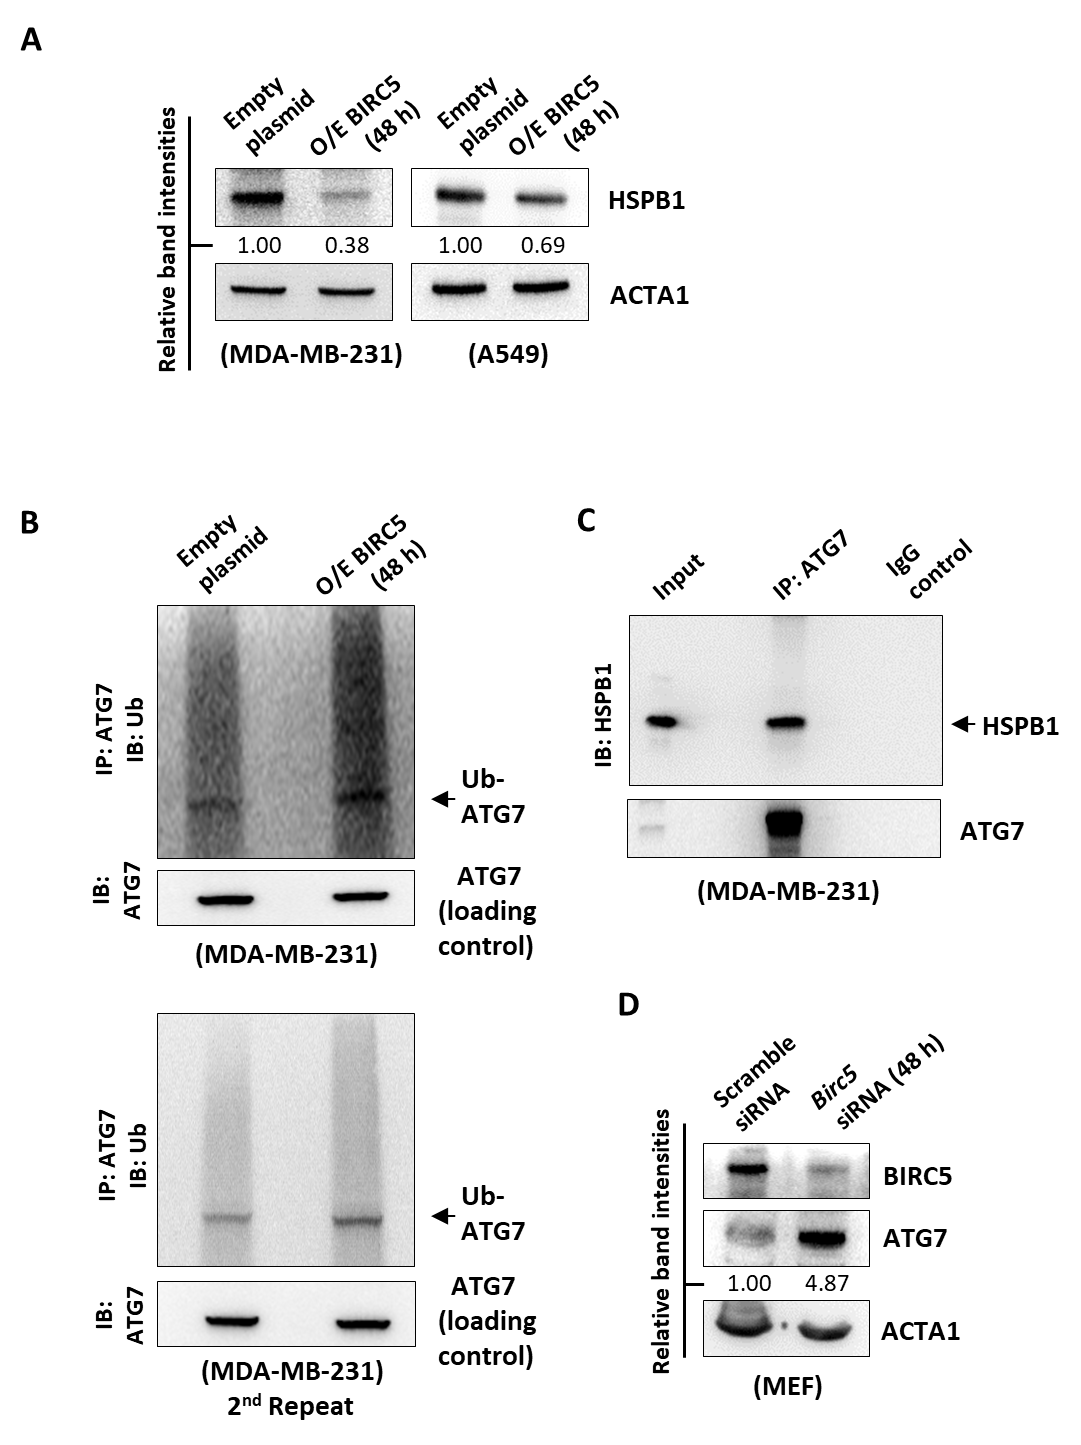


**Figure S2** **–** BIRC5 regulates HSPB1 expression and ATG7 ubiquitination in cells. **(A)** MDA-MB-231 and A549 cells were transfected with either the empty vector (empty plasmid DNA) or the BIRC5-expressing (O/E) plasmid DNA (O/E BIRC5) for 48 h. Expression of HSPB1 was determined by the western blot analysis. **(B)** MDA-MB-231 cells were transfected with either the empty vector (empty plasmid DNA) or the BIRC5-expressing plasmid DNA (O/E BIRC5) for 48 h. Endogenous proteins were extracted and subjected to the immunoprecipitation analysis. **(C)** Endogenous proteins extracted from MDA-MB-231 cells were subjected to the immunoprecipitation analysis. **(D)** MEF cells were treated with or without *Birc5* siRNA for 48 h and expression of ATG7 was determined by western blotting.


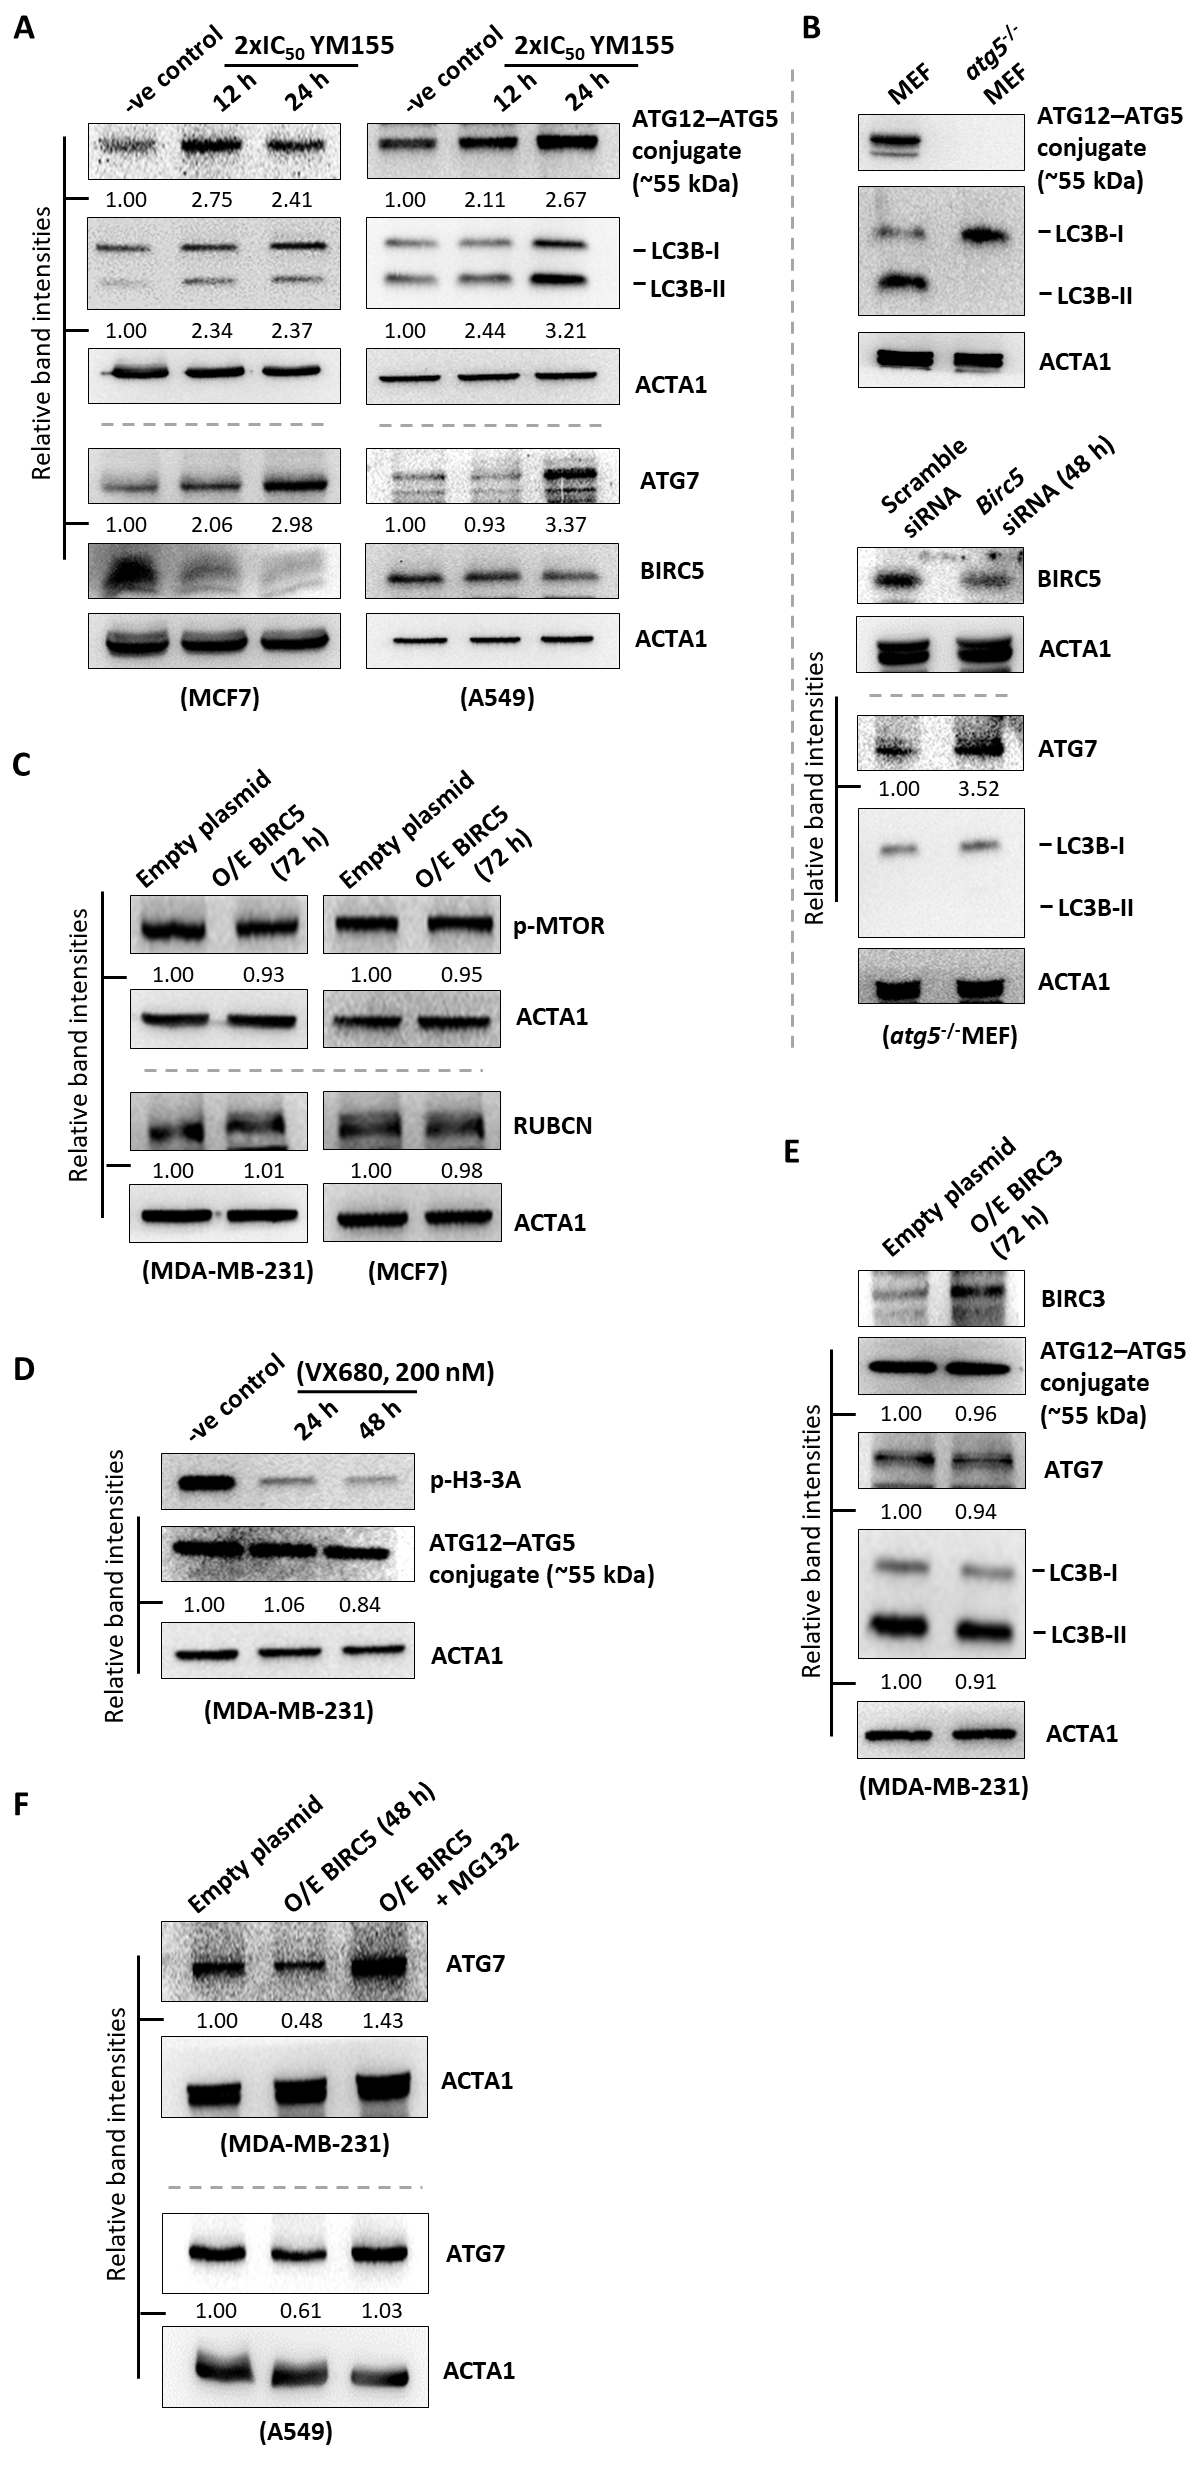


**Figure S3** **–** BIRC5 negatively modulates autophagy in cells. **(A)** MCF7 and A549 cells were treated with or without YM155 for 12 and 24 h. Expression of different proteins was determined by the western blot analysis. **(B)** Top panel - Expression of ATG12–ATG5 conjugate and conversion of LC3B-II in mouse MEF and the *atg5* knockout MEF (*atg5*-/- MEF) cells were determined by western blotting. Bottom panel - The mouse *atg5*-/- MEF cells were transfected with either scramble siRNA or *Birc5* siRNA for 48 h. Expression of ATG7 and conversion of LC3B-II were determined by western blotting. ACTA1 was used as the internal control. **(C)** MDA-MB-231 and MCF7 cells were transfected with either the empty vector (empty plasmid DNA) or the BIRC5-expressing plasmid DNA (O/E BIRC5) for 72 h. Expression of p-MTOR and RUBCN was determined by western blotting. **(D)** MDA-MB-231 cells were treated with or without VX680 for 24 and 48 h. Expression of different protein was determined by western blotting. **(E)** MDA-MB-231 cells were transfected with either the empty vector or O/E BIRC5 for 72 h. Expression of different proteins was determined by western blotting. **(F)** MDA-MB-231 cells were transfected with either the empty plasmid DNA (-ve control) or BIRC5-expressing pCMV6-XL4-*BIRC5* (O/E BIRC5) with/without MG132 for 48 h. Expression of ATG7 was determined by western blotting.


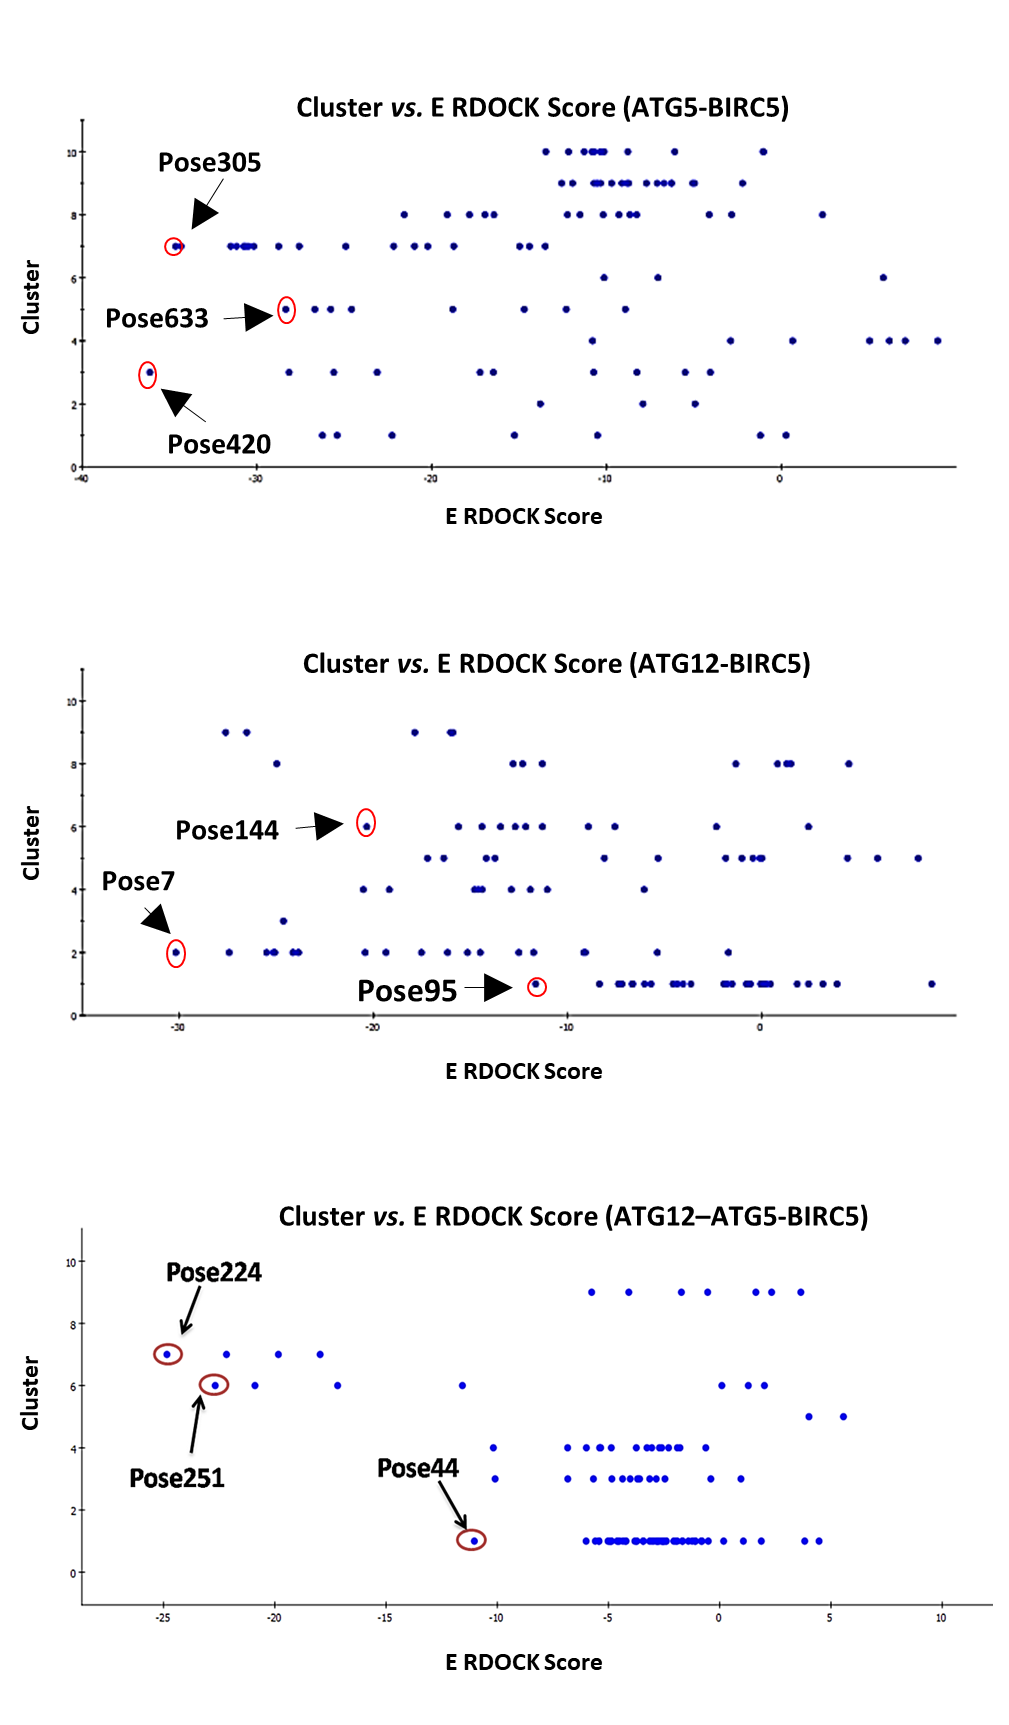


**Figure S4 -** RDOCK results of ATG5-BIRC5, ATG12-BIRC5, and ATG12–ATG5-BIRC5. The graphs were plotted against cluster vs E-RDOCK score. The top three cluster poses (circled in red) of each graphs were chosen for MD simulation.


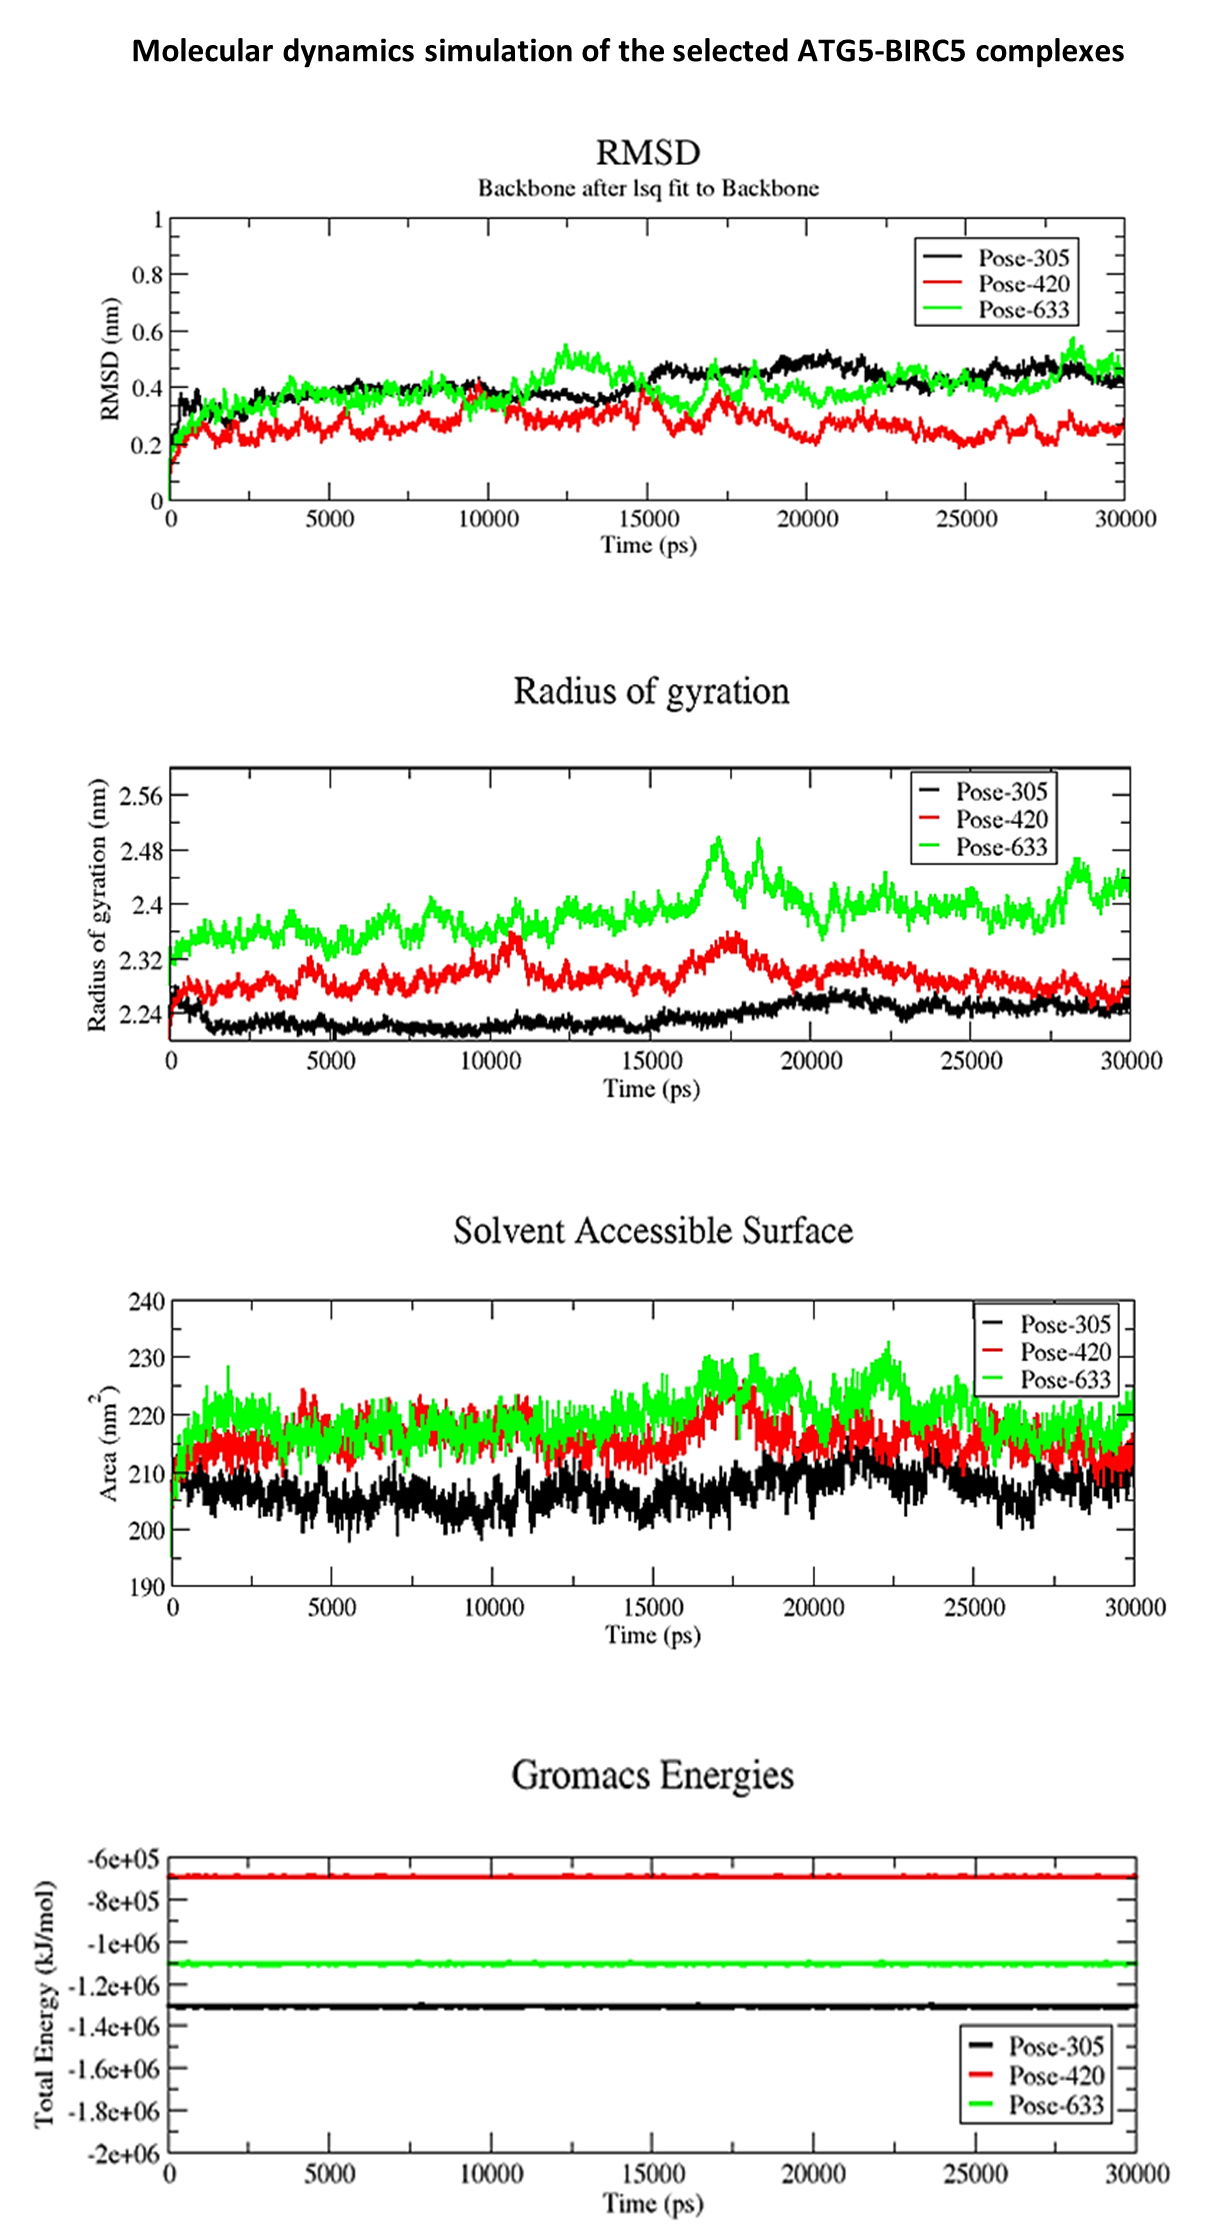


**Figure S5 -** Evaluation of ATG5-BIRC5stability by Molecular Dynamics (MD) simulation. Protein backbone root mean square deviation, radius of gyration, solvent accessible surface area and total energy of the Pose 305, 420 and 633 were determined and presented in black, red and green color line, respectively.


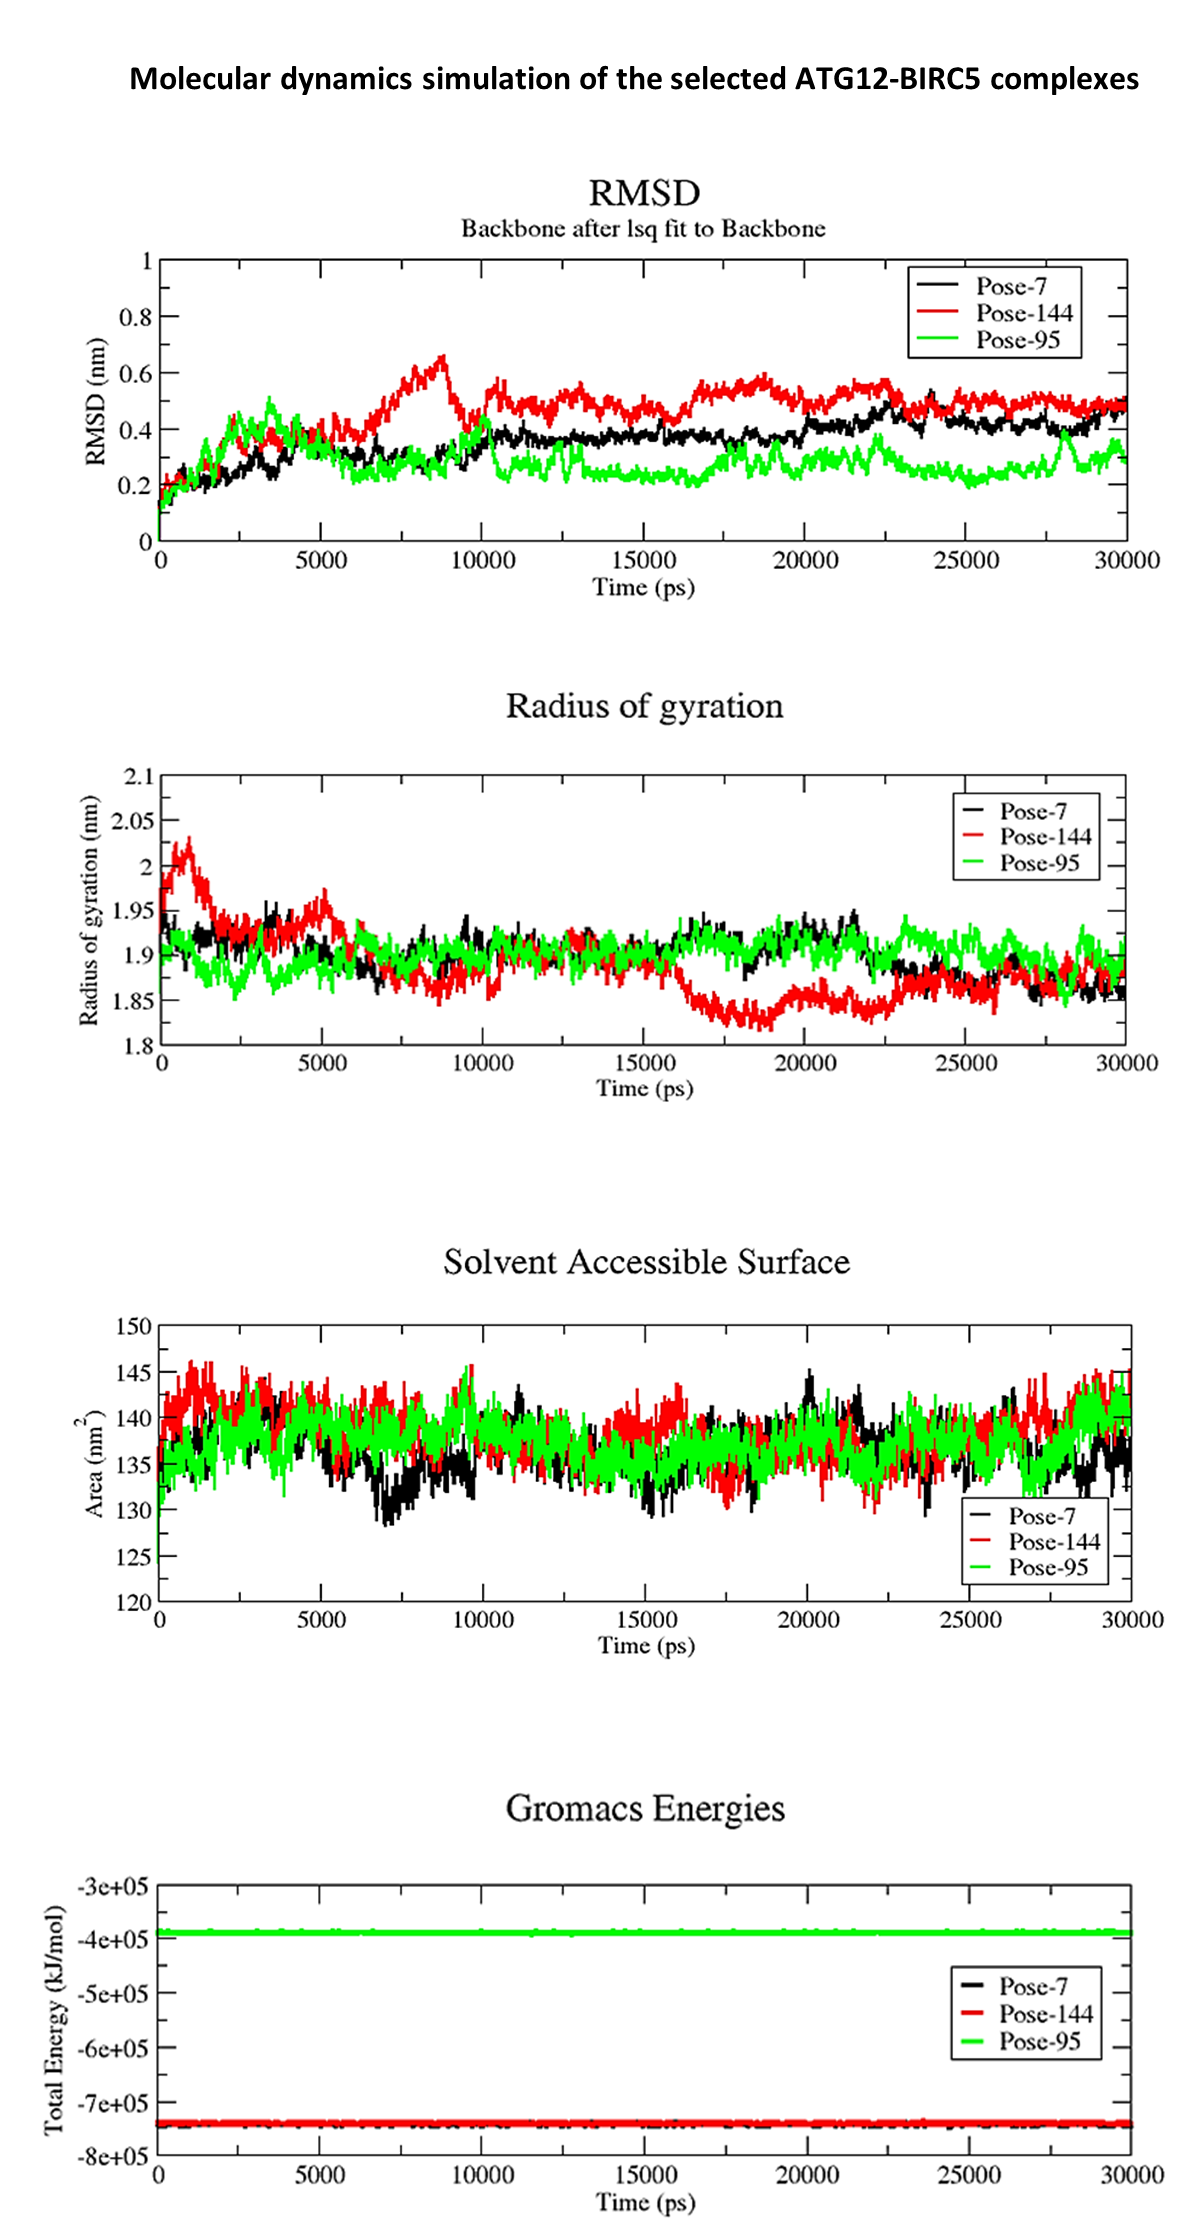


**Figure S6 -** Evaluation of ATG12-BIRC5 stability by Molecular Dynamics (MD) simulation. Protein backbone root mean square deviation, radius of gyration, solvent accessible surface area and total energy of the Pose 7, 144 and 95 were determined and presented in black, red and green color line, respectively.


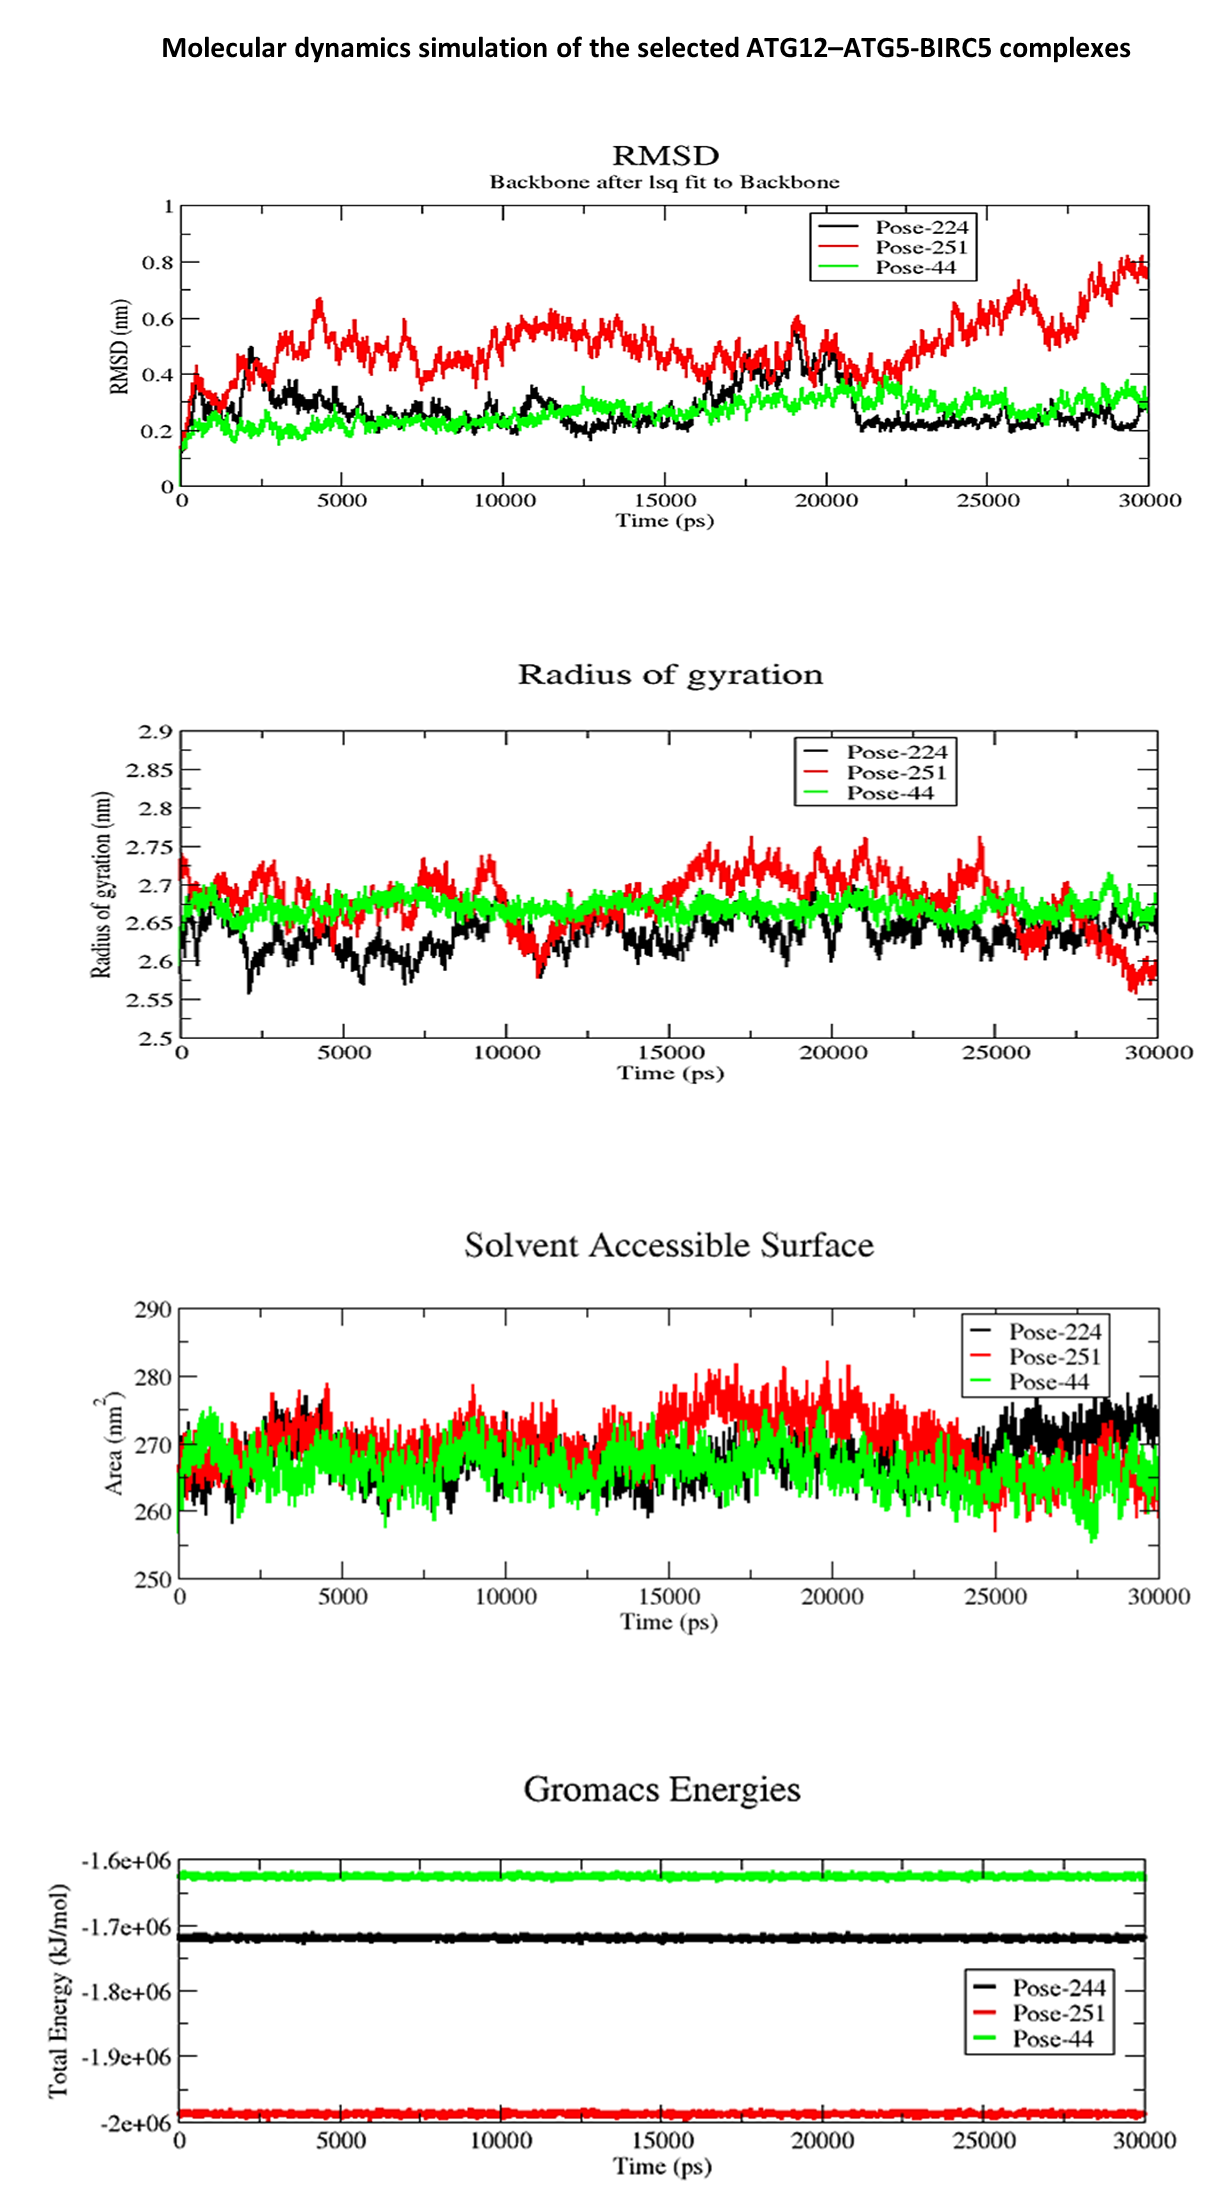


**Figure S7 -** Evaluation of ATG12–ATG5-BIRC5 stability by Molecular Dynamics (MD) simulation. Protein backbone root mean square deviation, radius of gyration, solvent accessible surface area and total energy of the Pose 244, 251 and 44 were determined and presented in black, red and green color line, respectively.


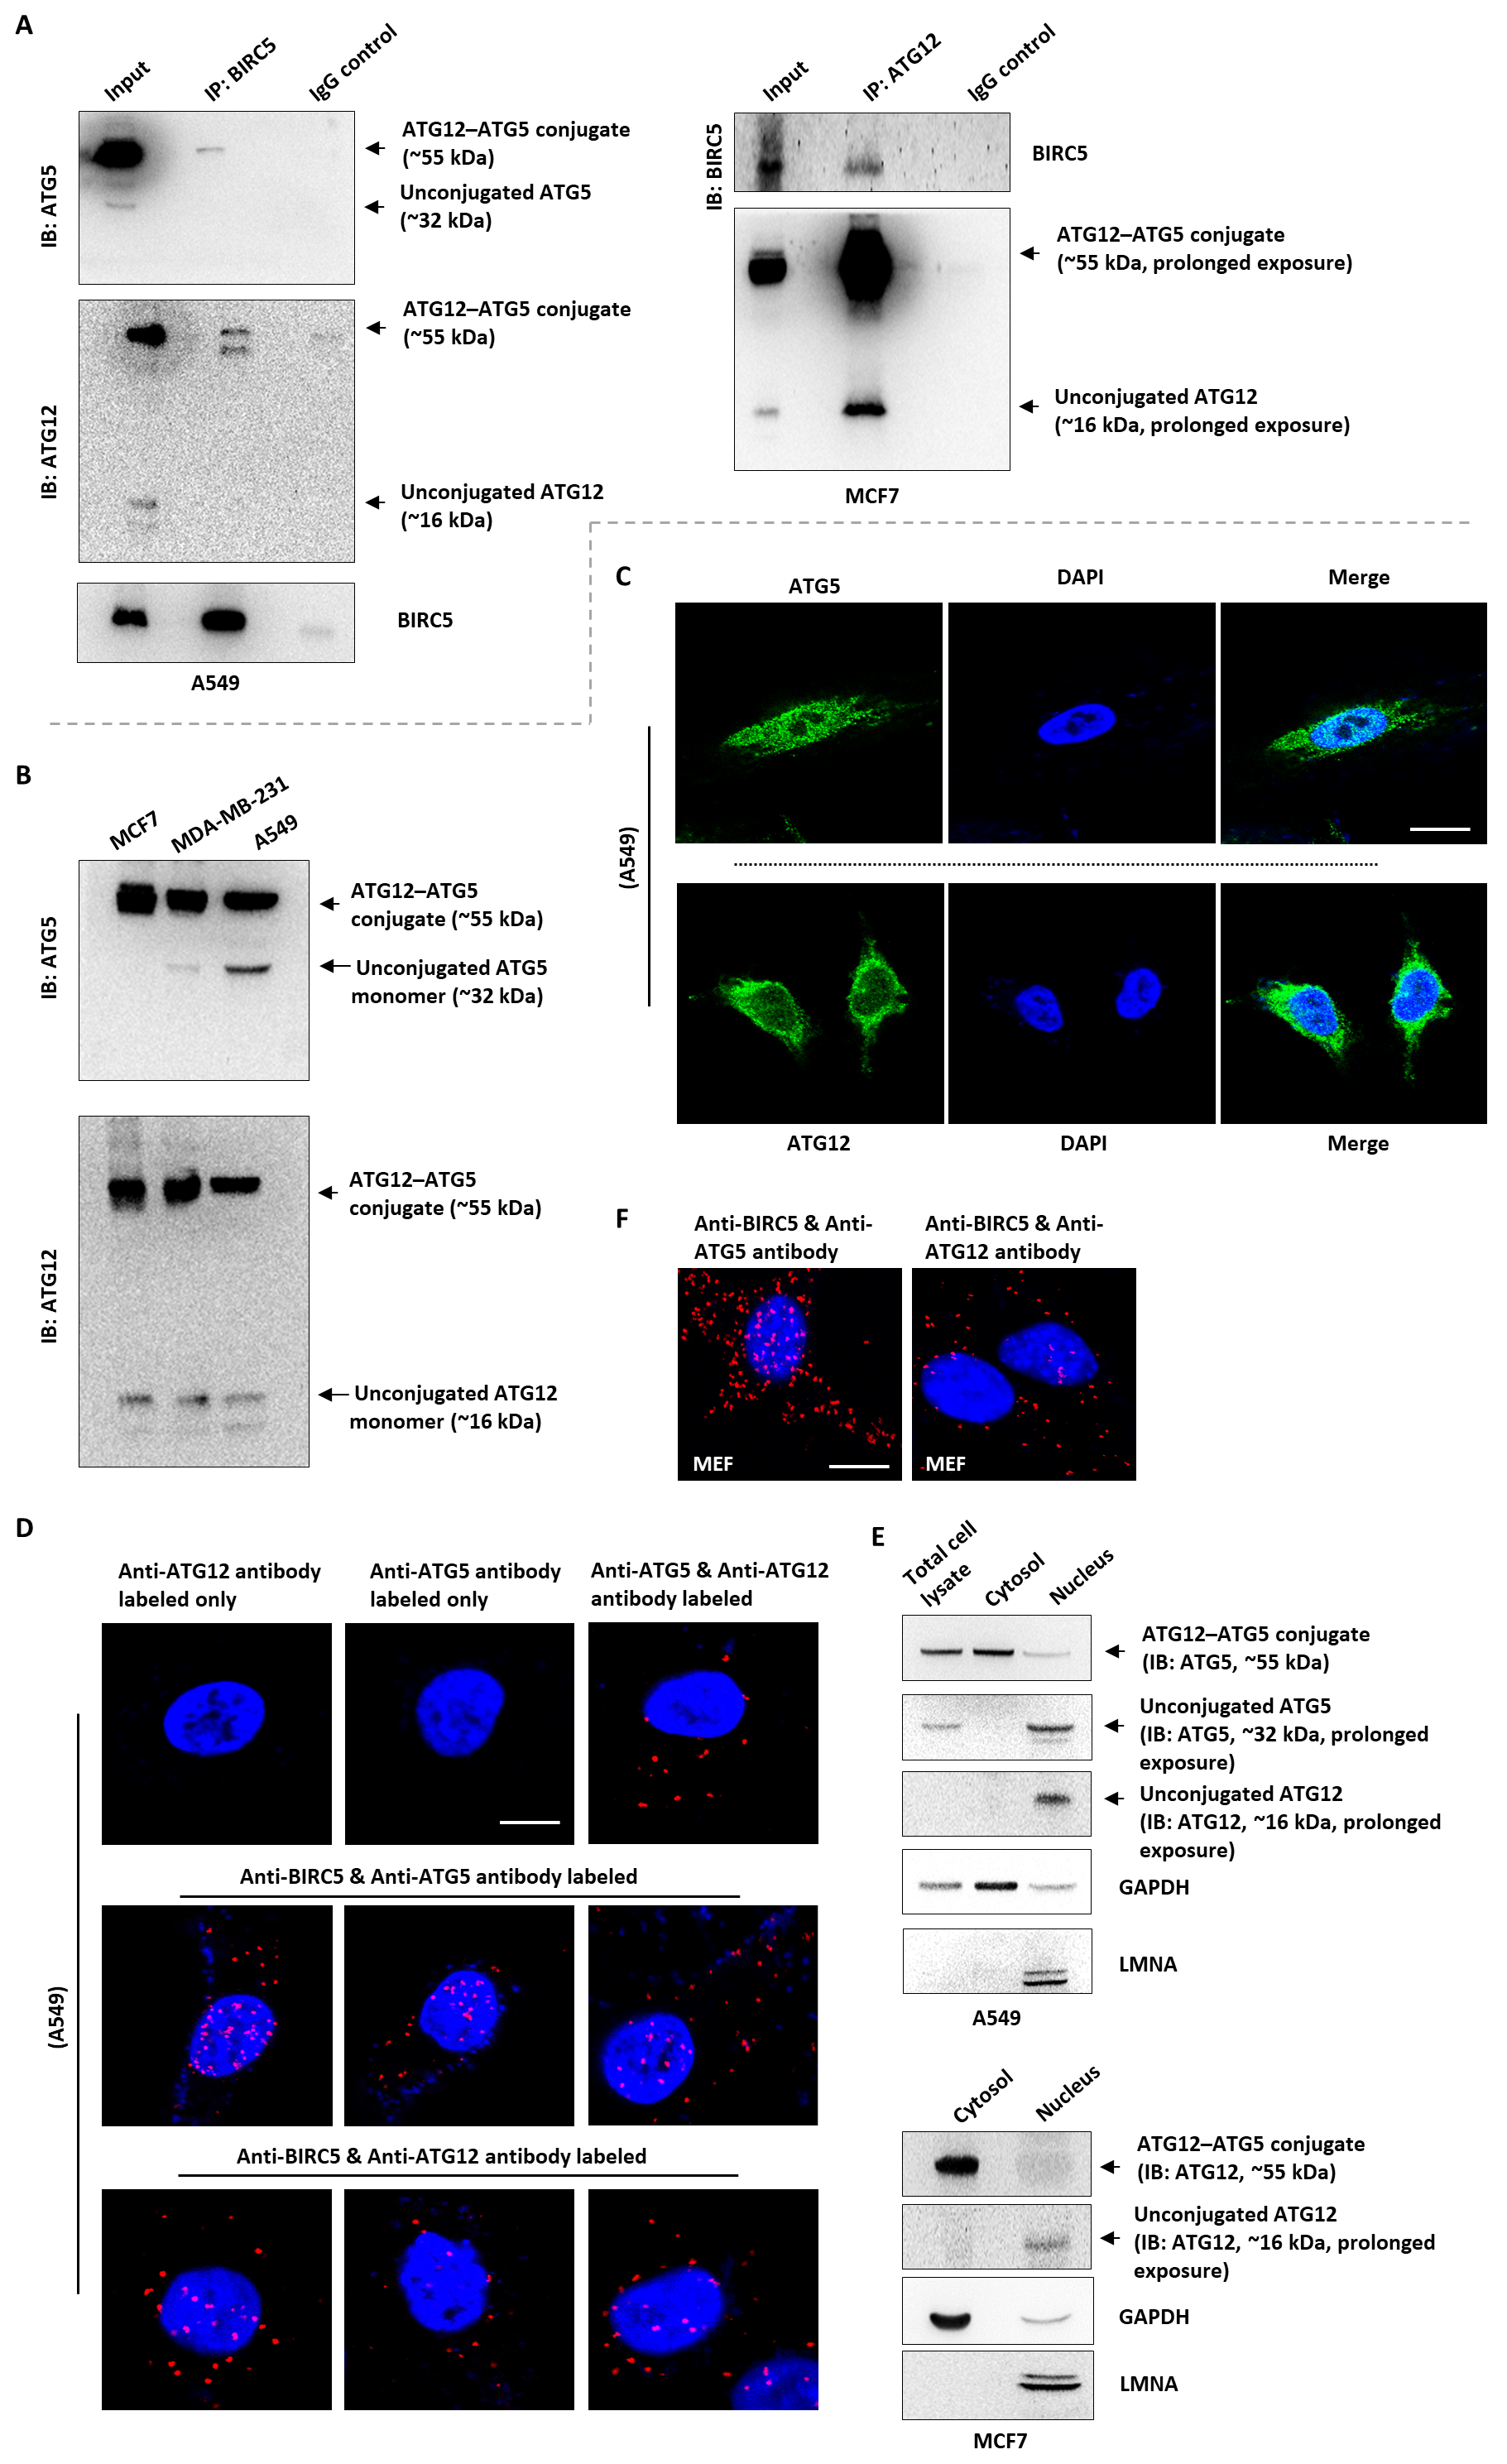


**Figure S8 –** BIRC5 binds to ATG12–ATG5 conjugate in mammalian cells. **(A)** Endogenous proteins extracted from A549 and MCF7 cells were subjected to the immunoprecipitation analysis. **(B)** Expression of ATG12–ATG5 conjugate, ATG12 monomer, and ATG5 monomer in MCF7, MDA-MB-231 and A549 cells was determined by western blotting. **(C)** Expression and intra-cellular localizations of ATG5 (together with ATG5-containing molecules) and ATG12 (together with ATG12-containing molecules) were determined by immunofluorescent microscopy. Nuclei were countered stained blue by DAPI. **(D)** Protein-protein interactions (*i.e.* red fluorescent puncta) between ATG5, ATG12, and BIRC5 in A549 cells were determined by *in situ* PLA. Nucleus were countered stained blue by DAPI. **(E)** Cytoplasmic and nucleic proteins were extracted from A549 and MCF7 cells and expression of different proteins was determined by the western blot analysis. GAPDH and LMNA were used as the internal control of the cytoplasmic and nucleic protein fraction, respectively. **(F)** Protein-protein interactions (*i.e.* red fluorescent puncta) between ATG5, ATG12, and BIRC5 in MEF cells were determined by *in situ* PLA. Nucleus were countered stained blue by DAPI. Scale bars: 25 μm (C), 15 μm (D and F).


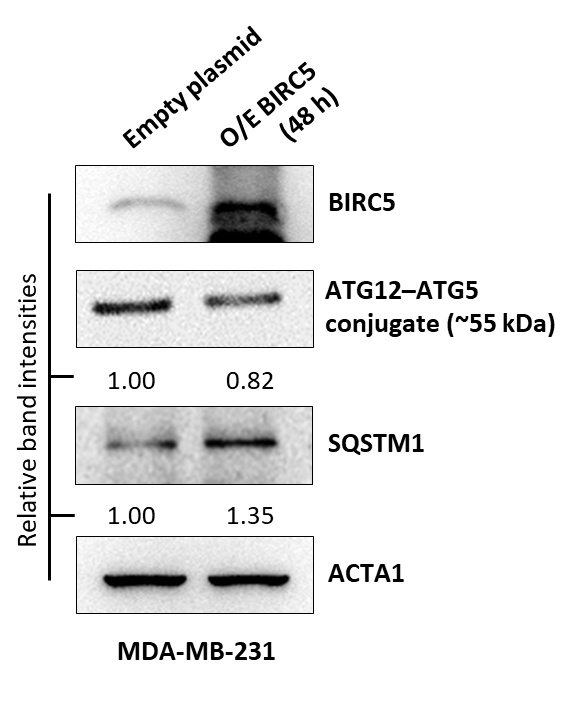


**Figure S9 –** BIRC5 negatively modulates the expression of ATG12–ATG5 conjugate in MDA-MB-231 cells. Cells were transfected with either the empty plasmid DNA or the BIRC5 overexpressing (O/E) plasmid DNA (O/E BIRC5) for 48 h. Expression of ATG12–ATG5 conjugate was determined by western blotting. ACTA1 was used as an internal control.


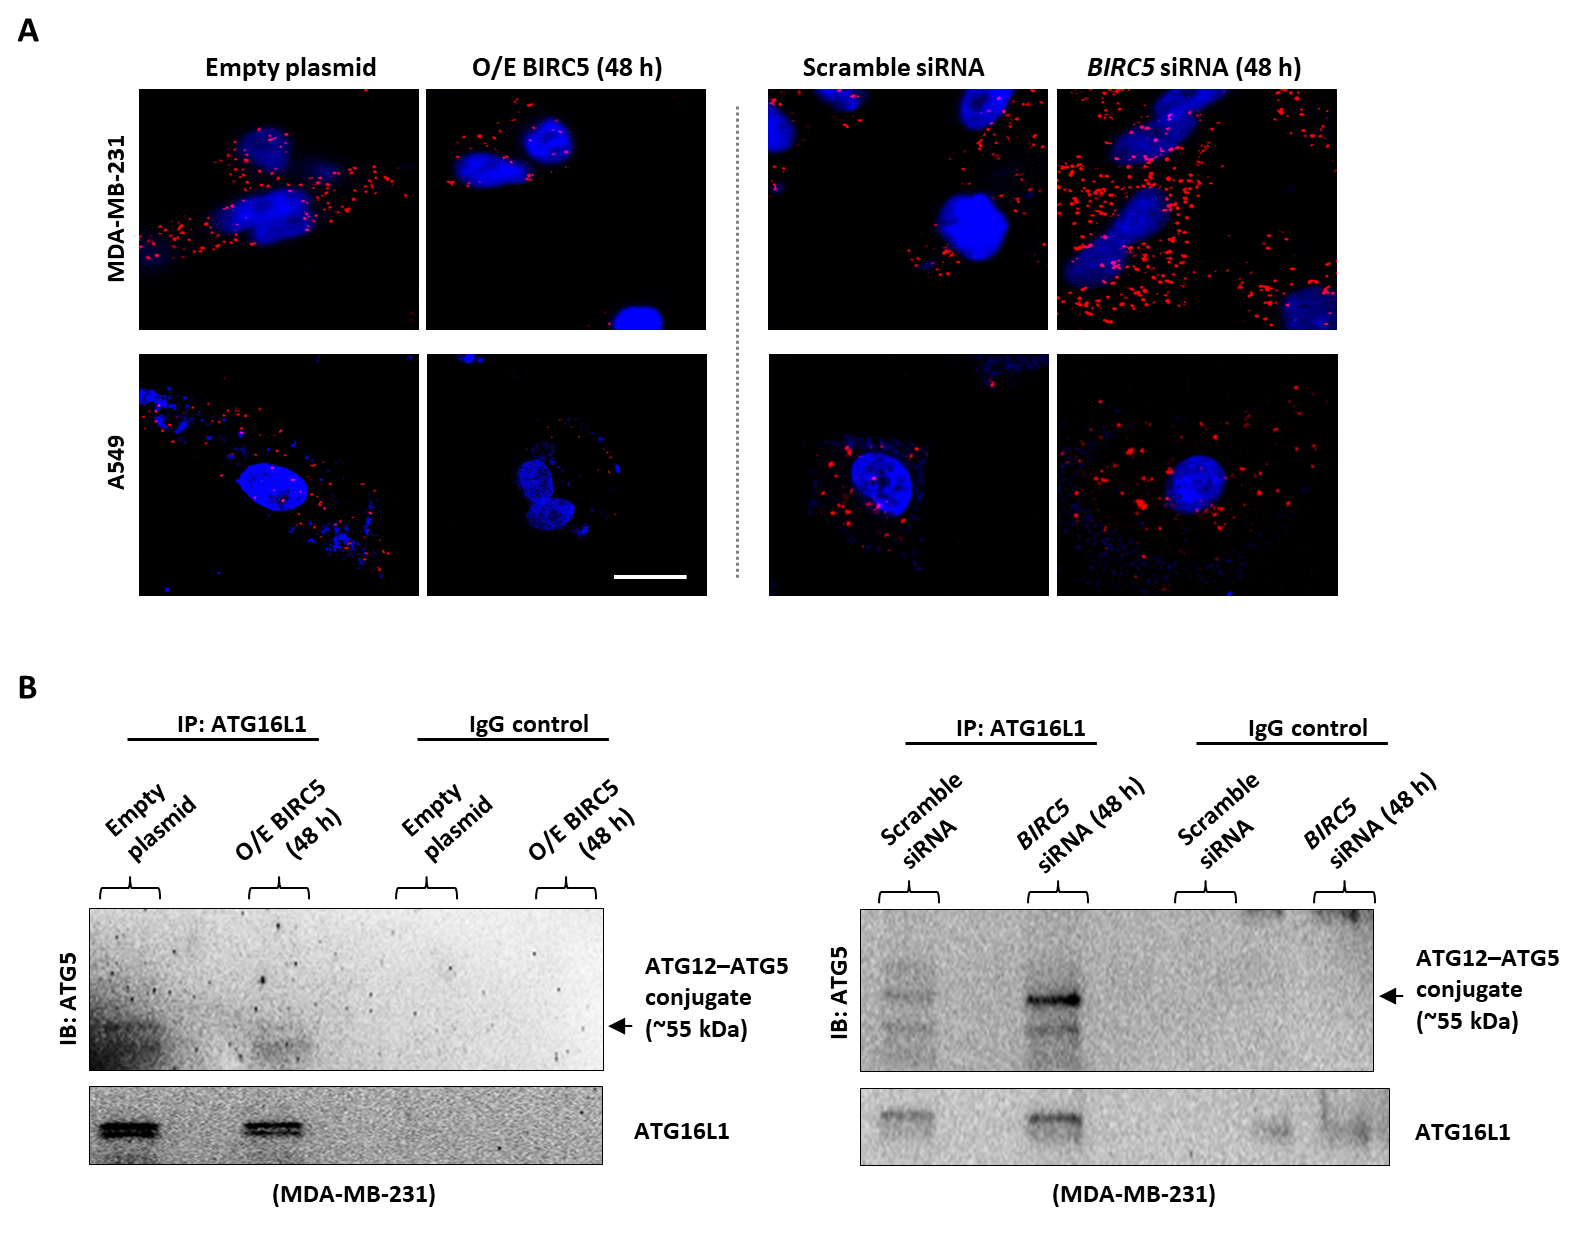


**Figure S10 –** BIRC5 negatively modulates the interactions between ATG12–ATG5 conjugate and ATG16L1 in cancer cells. **(A)** Representative photos of the *in situ* PLA as described in Fig. 6C. Physical interactions between ATG12 and ATG16L1 were detected by *in situ* PLA. Scale bar: 20 μm. **(B)** Cells were transfected with the empty plasmid DNA, BIRC5 expressing plasmid DNA, scramble siRNA, or *BIRC5* siRNA for 48 h. Lysates of MDA-MB-231 cells were immunoprecipitated with anti-ATG16L1 antibodies. Protein-protein interactions between ATG16L1 and ATG12–ATG5 conjugate were determined by western blotting.


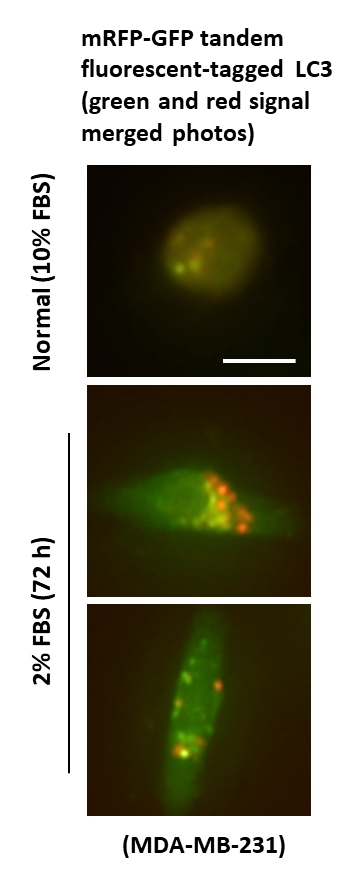


**Figure S11 –** Serum deprivation induces autophagy in cells. The mRFP-EGFP-LC3 expressing MDA-MB-231 cells were cultured under either normal (10% FBS) or serum deprived (2% FBS) conditions. Formation of green and red fluorescent LC3 puncta was determined using fluorescence microscopy. Images shown in this panel were the “merged-images” of the green and red fluorescence images. Scale bar: 25 μm.
